# Supplementary material for: Understanding metal-enhanced fluorescence and structural properties in Au@Ag core–shell nanocubes
Source: Royal Society of Chemistry journal article supplement (doi:10.1039/c9ra05103a), 2019-01-01
Supplement: c9ra05103a1.pdf [file c9ra05103a1.pdf]

Electronic Supplementary Information (ESI)

## Understanding Metal-Enhanced Fluorescence and Structural Properties in Au@Ag Core-shell Nanocubes

Dae-Woong Jung,<sup>a, b</sup> Jun Min Kim,<sup>a, b</sup> Hyung Joong Yun,<sup>a</sup> Gi-Ra Yi,<sup>b</sup> Jung Young Cho,<sup>c</sup>

Haeun Jung,<sup>d</sup> Gaehang Lee,<sup>\*, a</sup> Weon-Sik Chae,<sup>\*, e</sup> and Ki Min Nam<sup>\*, d</sup>

<sup>a</sup> *Korea Basic Science Institute, Daejeon, 34133, Republic of Korea*

<sup>b</sup> *Department of Chemical Engineering, Sungkyunkwan University, Suwon, 16419, Republic of Korea*

<sup>c</sup> *Korea Institute of Ceramic Engineering and Technology, Jinju 52851, Republic of Korea*

<sup>d</sup> *Department of Chemistry and Chemistry Institute for Functional Materials, Pusan National University, Busan 46241, Korea*

<sup>e</sup> *Analysis Research Division, Daegu Center, Korea Basic Science Institute, Daegu 41566, Republic of Korea*

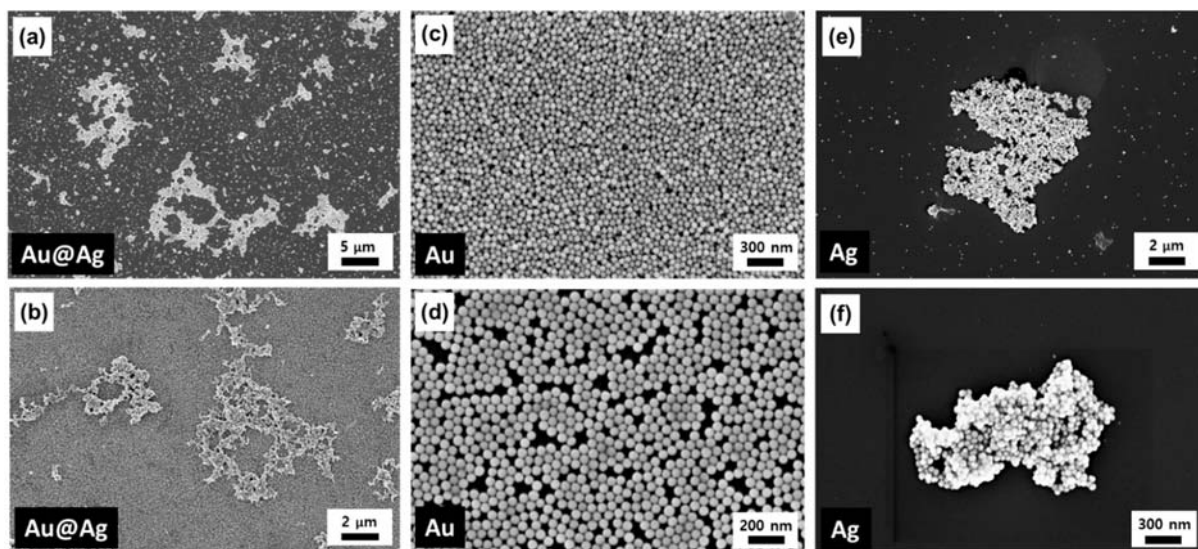

**Fig. S1** SEM images of (a) and (b) Au@AgNCs, (c) and (d) AuNPs, (e) and (f) AgNPs on FTO after complete solvent evaporation.

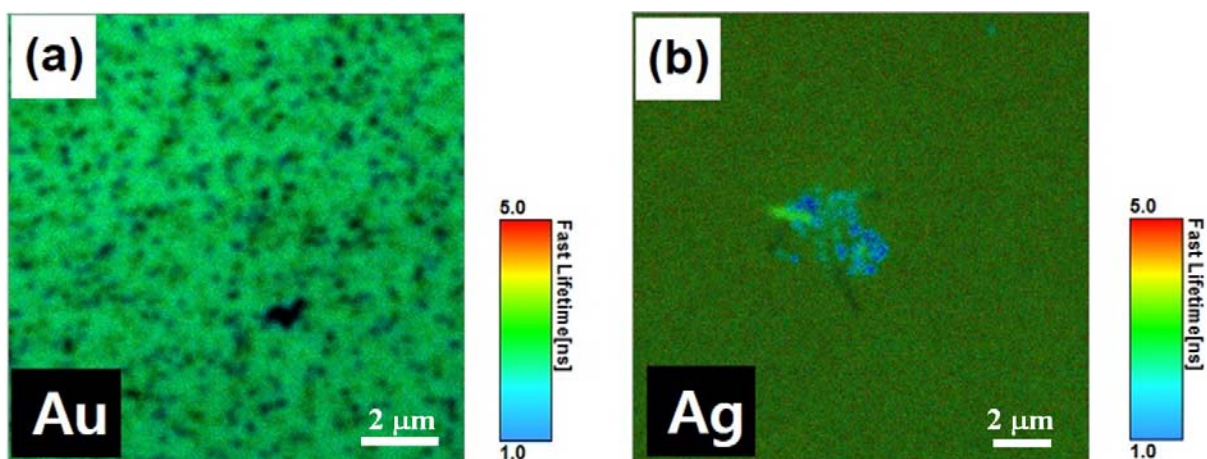

**Fig. S2** Fluorescence lifetime images of (a) AuNPs and (b) AgNPs with dye molecules after sedimentation for 60 min using 470 nm excited laser.
